# Supplementary material for: Subspecies Taxonomy and Inter-Population Divergences of the Critically Endangered Yellow-Breasted Bunting: Evidence from Song Variations
Source: MDPI journal article supplement (doi:10.3390/ani12172292), 2022-09-04
Supplement: s1 [file s1]

**Table S1.** The information of all subspecies, population location and individual numbers of song recordings. Songs used in population divergence analysis are indicated in bold.

| Subspecies            | Populations | Location                                   | Number of individuals |
|-----------------------|-------------|--------------------------------------------|-----------------------|
| <i>E. a. aureola</i>  | 1           | Sverdlovsk Oblast, Russia                  | 3                     |
|                       | 2           | Qinghe County, Xinjiang province, China    | 4                     |
|                       | 3           | Buryatiya, Russia                          | 8                     |
|                       | 4           | Lake Baikal, Russia                        | 5                     |
|                       | 5           | Northern Ostrobothnia, Finland             | 1                     |
| <i>E. a. ornata</i>   | 6           | Northeastern and eastern Mongolia          | 3                     |
|                       | 7           | Zhalong, Heilongjiang Province, China      | 8                     |
|                       | 8           | Xingkai Lake, Heilongjiang Province, China | 1                     |
|                       | 9           | Amurskaya Oblast, Russia                   | 1                     |
|                       | 10          | Muraviovka Park, The Russian Far East      | 35                    |
|                       | 11          | Khabarovsk, Russia                         | 1                     |
|                       | 12          | Khasyn, Magadanskaya Oblast, Russia        | 2                     |
|                       | 13          | Lena Valley Sakha, Respublika, Russia      | 1                     |
| <i>E. a. insulana</i> | 14          | Mombetsu, Hokkaido, Japan                  | 1                     |
|                       | 15          | Toyokoro, Hokkaido, Japan                  | 1                     |
|                       | 16          | Ikeda, Hokkaido, Japan                     | 1                     |
|                       | 17          | Toyotomi, Hokkaido, Japan                  | 12                    |
|                       | 18          | Yubetsu, Hokkaido, Japan                   | 1                     |

**Table S2.** KMO and Bartlett's test results among subspecies and population.

|            | Kaiser-Meyer-Olkin | Bartlett's Test |     |          |
|------------|--------------------|-----------------|-----|----------|
|            | <i>F</i>           | $\chi^2$        | df  | <i>P</i> |
| Subspecies | 0.587              | 4789.250        | 300 | 0.000    |
| Population | 0.601              | 4341.474        | 300 | 0.000    |

**Table S3.** Loadings and cumulative proportions of principal components of each parameter among subspecies.

| Variables             | PC1<br>(28.2%) | PC2<br>(16.9%) | PC3<br>(12.5%) | PC4<br>(9.0) | PC5<br>(6.1%) | PC6<br>(5.2%) | PC7<br>(4.7%) |
|-----------------------|----------------|----------------|----------------|--------------|---------------|---------------|---------------|
| Cumulative proportion | 28.2%          | 45.1%          | 57.6%          | 66.6%        | 72.7%         | 77.9%         | 82.7%         |

|            |        |        |        |        |        |        |        |
|------------|--------|--------|--------|--------|--------|--------|--------|
| Eigenvalue | 7.047  | 4.229  | 3.114  | 2.262  | 1.534  | 1.301  | 1.179  |
| Fmax       | -0.022 | -0.021 | 0.237  | -0.093 | 0.193  | 0.204  | 0.218  |
| Fmin       | 0.091  | -0.122 | -0.027 | 0.162  | 0.007  | 0.091  | 0.005  |
| Frangle    | -0.062 | 0.039  | 0.217  | -0.156 | 0.162  | 0.133  | 0.185  |
| Fpeak      | 0.005  | -0.092 | -0.071 | 0.015  | 0.210  | 0.317  | 0.296  |
| D          | -0.051 | 0.069  | 0.101  | -0.052 | -0.310 | 0.436  | -0.238 |
| Rate       | -0.081 | 0.079  | -0.048 | 0.286  | 0.120  | -0.020 | 0.076  |
| IN         | 0.038  | 0.182  | 0.059  | 0.155  | -0.112 | 0.032  | 0.161  |
| IFmax      | 0.098  | -0.088 | 0.126  | 0.137  | 0.116  | 0.108  | -0.171 |
| IFmin      | 0.081  | -0.141 | -0.001 | 0.168  | -0.034 | 0.137  | 0.005  |
| IFrange    | 0.072  | -0.009 | 0.178  | 0.056  | 0.191  | 0.041  | -0.245 |
| IFpeak     | 0.095  | -0.080 | 0.081  | 0.179  | 0.104  | 0.157  | -0.122 |
| ID         | 0.089  | 0.144  | 0.104  | 0.014  | -0.123 | -0.040 | -0.022 |
| IRate      | -0.084 | -0.045 | -0.099 | 0.110  | 0.045  | 0.161  | 0.270  |
| IDR        | 0.103  | 0.099  | 0.051  | 0.083  | 0.018  | -0.266 | -0.007 |
| RN         | -0.056 | 0.139  | -0.094 | 0.033  | 0.154  | 0.212  | -0.322 |
| RNS        | 0.056  | 0.130  | 0.010  | 0.173  | -0.196 | 0.180  | 0.325  |
| RNE        | 0.054  | -0.108 | -0.022 | -0.137 | -0.115 | -0.043 | 0.324  |
| RD         | 0.101  | 0.076  | 0.065  | -0.082 | -0.205 | 0.095  | 0.176  |
| RDR        | 0.023  | 0.133  | -0.117 | -0.044 | 0.295  | 0.125  | -0.088 |
| RSRate     | -0.087 | 0.059  | -0.038 | 0.271  | 0.011  | 0.011  | 0.115  |
| MN         | -0.111 | -0.041 | 0.118  | 0.040  | -0.207 | 0.147  | -0.126 |
| MRate      | -0.113 | -0.091 | 0.091  | 0.079  | -0.087 | -0.049 | -0.023 |
| MFpeak     | -0.083 | -0.047 | 0.165  | 0.089  | -0.038 | -0.167 | -0.033 |
| MFrangle   | -0.052 | -0.031 | 0.150  | 0.151  | -0.010 | -0.297 | 0.057  |
| MFmaxmin   | -0.016 | 0.112  | 0.135  | -0.042 | 0.291  | -0.101 | 0.163  |

**Table S4.** Loadings and cumulative proportions of principal components of each parameter among populations.

| Variables             | PC1<br>(27.8%) | PC2<br>(17.2%) | PC3<br>(12.6%) | PC4<br>(8.7%) | PC5<br>(6.4%) | PC6<br>(5.4%) | PC7<br>(4.5%) |
|-----------------------|----------------|----------------|----------------|---------------|---------------|---------------|---------------|
| Cumulative proportion | 27.8%          | 45.0%          | 57.6%          | 66.2%         | 72.6%         | 78.0%         | 82.5%         |
| Eigenvalue            | 6.952          | 4.301          | 3.139          | 2.163         | 1.599         | 1.355         | 1.113         |
| Fmax                  | -0.021         | -0.013         | 0.242          | -0.037        | 0.143         | 0.238         | 0.256         |

|          |        |        |        |        |        |        |        |
|----------|--------|--------|--------|--------|--------|--------|--------|
| Fmin     | 0.086  | -0.135 | -0.038 | 0.164  | 0.004  | 0.076  | -0.004 |
| Frangle  | -0.058 | 0.052  | 0.227  | -0.109 | 0.122  | 0.171  | 0.224  |
| Fpeak    | 0.004  | -0.104 | -0.080 | -0.029 | 0.146  | 0.351  | 0.207  |
| D        | -0.046 | 0.086  | 0.089  | -0.006 | -0.351 | 0.363  | -0.261 |
| Rate     | -0.076 | 0.070  | -0.069 | 0.316  | 0.129  | -0.032 | 0.103  |
| IN       | 0.057  | 0.171  | 0.025  | 0.151  | -0.118 | 0.010  | 0.162  |
| IFmax    | 0.101  | -0.089 | 0.112  | 0.145  | 0.104  | 0.130  | -0.155 |
| IFmin    | 0.079  | -0.147 | -0.017 | 0.175  | -0.054 | 0.096  | 0.013  |
| IFrange  | 0.079  | -0.009 | 0.170  | 0.064  | 0.186  | 0.106  | -0.226 |
| IFpeak   | 0.098  | -0.086 | 0.064  | 0.188  | 0.077  | 0.143  | -0.123 |
| ID       | 0.097  | 0.137  | 0.084  | 0.019  | -0.108 | -0.052 | -0.047 |
| IRate    | -0.081 | -0.054 | -0.107 | 0.080  | 0.008  | 0.157  | 0.323  |
| IDR      | 0.109  | 0.089  | 0.031  | 0.079  | 0.061  | -0.257 | -0.007 |
| RN       | -0.055 | 0.140  | -0.089 | 0.055  | 0.139  | 0.217  | -0.344 |
| RNS      | 0.070  | 0.109  | -0.019 | 0.176  | -0.224 | 0.117  | 0.343  |
| RNE      | 0.045  | -0.123 | -0.012 | -0.145 | -0.124 | -0.050 | 0.255  |
| RD       | 0.105  | 0.072  | 0.061  | -0.064 | -0.217 | 0.068  | 0.180  |
| RDR      | 0.022  | 0.123  | -0.105 | -0.052 | 0.282  | 0.164  | -0.085 |
| RSRate   | -0.080 | 0.055  | -0.084 | 0.285  | 0.026  | 0.023  | 0.142  |
| MN       | -0.111 | -0.023 | 0.116  | 0.081  | -0.227 | 0.114  | -0.139 |
| MRate    | -0.116 | -0.079 | 0.092  | 0.105  | -0.080 | -0.051 | -0.018 |
| MFpeak   | -0.076 | -0.049 | 0.176  | 0.085  | -0.025 | -0.168 | -0.074 |
| MFrange  | -0.044 | -0.034 | 0.144  | 0.160  | 0.030  | -0.308 | 0.019  |
| MFmaxmin | -0.008 | 0.109  | 0.137  | -0.027 | 0.271  | -0.071 | 0.226  |

**Table S5.** Means of acoustic parameters of song which are shown  $\pm$  SD and results of one-way ANOVA showing significant differences among 3 subspecies. N is the number of individuals.

|                        | Fmax           | Fmin           | Frang          | D             | Rate          | RN            | MFmaxmin          |
|------------------------|----------------|----------------|----------------|---------------|---------------|---------------|-------------------|
| <i>aureola</i> (N=21)  | 5624 $\pm$ 340 | 1957 $\pm$ 288 | 3668 $\pm$ 466 | 1.8 $\pm$ 0.2 | 4.1 $\pm$ 0.4 | 2.6 $\pm$ 0.5 | 41453 $\pm$ 9371  |
| <i>ornata</i> (N=52)   | 5604 $\pm$ 541 | 1940 $\pm$ 230 | 3664 $\pm$ 595 | 1.7 $\pm$ 0.3 | 4.4 $\pm$ 0.4 | 2.7 $\pm$ 0.7 | 39357 $\pm$ 9127  |
| <i>insulana</i> (N=16) | 5646 $\pm$ 514 | 2258 $\pm$ 205 | 3388 $\pm$ 592 | 1.7 $\pm$ 0.3 | 3.5 $\pm$ 0.2 | 1.8 $\pm$ 0.6 | 31736 $\pm$ 10294 |
| <b>ANOVA</b>           |                |                |                |               |               |               |                   |
| $F_{(2,86)}$           | 0.047          | 11.110         | 1.565          | 2.502         | 33.350        | 12.630        | 5.397             |
| $P$                    | 0.954          | 0.000          | 0.215          | 0.088         | 0.000         | 0.000         | 0.006             |

**Table S6.** Means of acoustic parameters of song which are shown  $\pm$  SD and results of Kruskal-Wallis rank sum test showing significant differences among 3 subspecies. N is the number of individuals.

|                                     | Fpeak          | IN            | IFmax          | IFmin          | IFrang         | IFpeak         | ID            | IRate         | IDR           | RNS           | RNE           | RD            | RDR           | RSRate        | MN            | Mrate         | MFpeak         | MFrang         |
|-------------------------------------|----------------|---------------|----------------|----------------|----------------|----------------|---------------|---------------|---------------|---------------|---------------|---------------|---------------|---------------|---------------|---------------|----------------|----------------|
| <i>aureola</i> (N=21)               | 3580 $\pm$ 566 | 2.4 $\pm$ 0.5 | 3390 $\pm$ 775 | 2100 $\pm$ 448 | 1290 $\pm$ 543 | 2861 $\pm$ 761 | 0.6 $\pm$ 0.2 | 4.5 $\pm$ 0.8 | 0.3 $\pm$ 0.1 | 2.4 $\pm$ 0.4 | 1.9 $\pm$ 0.4 | 0.5 $\pm$ 0.1 | 0.7 $\pm$ 0.1 | 4.5 $\pm$ 0.4 | 3.2 $\pm$ 0.9 | 1.7 $\pm$ 0.5 | 1154 $\pm$ 439 | 1071 $\pm$ 376 |
| <i>ornata</i> (N=52)                | 3584 $\pm$ 471 | 2.1 $\pm$ 0.5 | 2882 $\pm$ 447 | 2031 $\pm$ 288 | 850 $\pm$ 304  | 2468 $\pm$ 349 | 0.4 $\pm$ 0.1 | 5.0 $\pm$ 1.0 | 0.3 $\pm$ 0.1 | 2.2 $\pm$ 0.3 | 1.7 $\pm$ 0.3 | 0.4 $\pm$ 0.1 | 0.7 $\pm$ 0.2 | 5.2 $\pm$ 0.9 | 3.6 $\pm$ 1.1 | 2.1 $\pm$ 0.5 | 1558 $\pm$ 568 | 1269 $\pm$ 479 |
| <i>insulana</i> (N=16)              | 3870 $\pm$ 544 | 1.6 $\pm$ 0.6 | 3715 $\pm$ 464 | 2458 $\pm$ 290 | 1256 $\pm$ 473 | 2939 $\pm$ 396 | 0.4 $\pm$ 0.2 | 4.6 $\pm$ 1.7 | 0.3 $\pm$ 0.1 | 2.0 $\pm$ 0.2 | 2.2 $\pm$ 0.5 | 0.5 $\pm$ 0.1 | 0.5 $\pm$ 0.2 | 3.9 $\pm$ 0.6 | 3.0 $\pm$ 0.9 | 1.8 $\pm$ 0.3 | 1370 $\pm$ 333 | 1100 $\pm$ 428 |
| <b>Kruskal-Wallis rank sum test</b> |                |               |                |                |                |                |               |               |               |               |               |               |               |               |               |               |                |                |
| $\chi^2$                            | 4.232          | 17.302        | 29.875         | 18.889         | 19.909         | 16.114         | 7.797         | 6.672         | 2.290         | 23.226        | 14.023        | 15.763        | 10.425        | 32.519        | 5.163         | 8.237         | 8.685          | 2.783          |
| $p$                                 | 0.121          | 0.000         | 0.000          | 0.000          | 0.000          | 0.000          | 0.020         | 0.036         | 0.318         | 0.000         | 0.001         | 0.000         | 0.005         | 0.000         | 0.076         | 0.016         | 0.013          | 0.249          |

**Table S7.** Linear discriminant analysis (LDA) of three subspecies. Percent variance, and the coefficients of linear discriminants of principal components.

|     | Percent variance (%) | PC1      | PC2      | PC3      |
|-----|----------------------|----------|----------|----------|
| LD1 | 83.0                 | 0.738663 | -1.37218 | -0.0257  |
| LD2 | 17.0                 | 0.943009 | 0.3857   | 0.571399 |

**Table S8.** Means of acoustic parameters of song which are shown  $\pm$  SD and results of one-way ANOVA showing significant differences among 9 populations. N is the number of individuals.

|         | Fmax           | Frang          | D             | Rate          | RN            | RSRate        | MFmaxmin          |
|---------|----------------|----------------|---------------|---------------|---------------|---------------|-------------------|
| 1 (N=3) | 5386 $\pm$ 158 | 3349 $\pm$ 236 | 1.9 $\pm$ 0.1 | 4.2 $\pm$ 0.3 | 2.7 $\pm$ 0.4 | 4.9 $\pm$ 0.2 | 39102 $\pm$ 7925  |
| 2 (N=4) | 5404 $\pm$ 261 | 3517 $\pm$ 315 | 1.8 $\pm$ 0.1 | 4.0 $\pm$ 0.2 | 2.4 $\pm$ 0.4 | 4.6 $\pm$ 0.4 | 40198 $\pm$ 9656  |
| 3 (N=8) | 5795 $\pm$ 355 | 3934 $\pm$ 461 | 1.9 $\pm$ 0.2 | 4.2 $\pm$ 0.4 | 2.7 $\pm$ 0.5 | 4.6 $\pm$ 0.4 | 44903 $\pm$ 7218  |
| 4 (N=5) | 5686 $\pm$ 374 | 3547 $\pm$ 594 | 1.8 $\pm$ 0.2 | 4.1 $\pm$ 0.4 | 2.5 $\pm$ 0.6 | 4.4 $\pm$ 0.6 | 38655 $\pm$ 14377 |
| 5 (N=3) | 5430 $\pm$ 107 | 3701 $\pm$ 39  | 1.8 $\pm$ 0.3 | 4.0 $\pm$ 0.4 | 2.3 $\pm$ 0.3 | 4.2 $\pm$ 0.5 | 43754 $\pm$ 4932  |

|              |          |          |         |         |         |         |             |
|--------------|----------|----------|---------|---------|---------|---------|-------------|
| 6 (N=8)      | 5597±495 | 3522±318 | 1.7±0.2 | 4.6±0.3 | 2.9±0.8 | 5.3±0.5 | 39343±7593  |
| 7 (N=35)     | 5575±584 | 3663±675 | 1.8±0.3 | 4.4±0.4 | 2.8±0.7 | 5.2±0.6 | 37369±8806  |
| 8 (N=2)      | 5870±113 | 3741±77  | 1.8±0.0 | 3.9±0.2 | 2.3±0.1 | 4.6±0.4 | 57757±601   |
| 9 (N=12)     | 5648±577 | 3343±632 | 1.6±0.3 | 3.5±0.2 | 1.7±0.6 | 3.9±0.6 | 30552±10035 |
| <b>ANOVA</b> |          |          |         |         |         |         |             |
| $F_{(8,71)}$ | 0.433    | 0.805    | 1.048   | 10.320  | 3.486   | 7.602   | 3.020       |
| $P$          | 0.898    | 0.600    | 0.409   | 0.000   | 0.002   | 0.000   | 0.006       |

**Table S9.** Means of acoustic parameters of song which are shown  $\pm$  SD and results of Kruskal-Wallis rank sum test showing significant differences among 9 populations. N is the number of individuals.

|                                     | Fmin     | Fpeak    | IN      | IFmax     | IFmin    | IFrange  | IFpeak   | ID      | IRate   | IDR     | RNS     | RNE     | RD      | RDR     | MN      | Mrate   | MFpeak   | MFrage   |
|-------------------------------------|----------|----------|---------|-----------|----------|----------|----------|---------|---------|---------|---------|---------|---------|---------|---------|---------|----------|----------|
| 1 (N=3)                             | 2037±173 | 3269±287 | 2.7±0.6 | 3369±389  | 2103±242 | 1266±287 | 2883±370 | 0.6±0.1 | 4.8±0.6 | 0.3±0.1 | 2.4±0.5 | 1.6±0.0 | 0.5±0.2 | 0.7±0.1 | 3.4±1.1 | 1.8±0.6 | 1057±266 | 1180±71  |
| 2 (N=4)                             | 1887±68  | 3791±804 | 2.0±0.7 | 3034±374  | 1968±35  | 1067±385 | 2400±206 | 0.5±0.2 | 5.0±1.2 | 0.3±0.1 | 2.2±0.2 | 2.1±0.3 | 0.5±0.1 | 0.7±0.1 | 3.2±0.2 | 1.8±0.1 | 1124±388 | 1029±188 |
| 3 (N=8)                             | 1861±277 | 3473±591 | 2.3±0.3 | 3305±859  | 2038±397 | 1267±742 | 2825±878 | 0.6±0.1 | 4.2±0.3 | 0.3±0.1 | 2.3±0.4 | 1.8±0.3 | 0.5±0.1 | 0.7±0.1 | 3.6±1.0 | 1.9±0.5 | 1251±464 | 1277±308 |
| 4 (N=5)                             | 2138±438 | 3882±362 | 2.7±0.5 | 3892±1019 | 2353±760 | 1539±474 | 3368±925 | 0.6±0.2 | 4.5±1.0 | 0.4±0.1 | 2.6±0.4 | 1.8±0.5 | 0.6±0.2 | 0.8±0.1 | 2.7±1.2 | 1.5±0.5 | 1172±598 | 808±516  |
| 5 (N=3)                             | 1729±145 | 3158±389 | 1.9±0.1 | 3107±149  | 2007±131 | 1101±192 | 2667±226 | 0.5±0.1 | 3.9±0.6 | 0.3±0.0 | 2.0±0.0 | 1.8±0.3 | 0.5±0.1 | 0.6±0.1 | 3.7±0.8 | 2.1±0.1 | 2187±386 | 1541±527 |
| 6 (N=8)                             | 2075±215 | 3877±593 | 2.2±0.4 | 3276±662  | 2152±245 | 1124±524 | 2654±361 | 0.4±0.1 | 5.4±1.0 | 0.3±0.1 | 2.1±0.1 | 1.7±0.3 | 0.4±0.1 | 0.7±0.1 | 3.4±0.5 | 2.0±0.2 | 1630±540 | 1296±542 |
| 7 (N=35)                            | 1913±218 | 3538±446 | 2.0±0.5 | 2721±328  | 1991±298 | 729±177  | 2380±342 | 0.4±0.1 | 5.1±0.8 | 0.3±0.1 | 2.1±0.3 | 1.7±0.3 | 0.4±0.1 | 0.7±0.3 | 3.7±1.3 | 2.1±0.5 | 1496±480 | 1184±421 |
| 8 (N=2)                             | 2130±36  | 3644±479 | 2.9±0.1 | 3299±41   | 2130±36  | 1170±5.0 | 2784±54  | 0.8±0.0 | 3.8±0.1 | 0.4±0.0 | 2.6±0.1 | 1.9±0.1 | 0.6±0.0 | 0.7±0.0 | 2.6±0.1 | 1.4±0.0 | 1181±298 | 1182±289 |
| 9 (N=12)                            | 2305±182 | 3965±575 | 1.5±0.5 | 3783±462  | 2508±265 | 1275±537 | 2991±425 | 0.4±0.2 | 4.6±2.0 | 0.3±0.1 | 1.9±0.2 | 2.4±0.5 | 0.5±0.1 | 0.5±0.2 | 2.9±0.8 | 1.8±0.4 | 1339±370 | 1055±485 |
| <b>Kruskal-Wallis rank sum test</b> |          |          |         |           |          |          |          |         |         |         |         |         |         |         |         |         |          |          |
| $\chi^2$                            | 28.012   | 14.347   | 33.344  | 40.743    | 23.021   | 31.827   | 28.610   | 21.027  | 17.477  | 12.059  | 33.285  | 23.771  | 25.054  | 11.898  | 9.915   | 13.138  | 13.422   | 7.168    |
| $p$                                 | 0.000    | 0.073    | 0.000   | 0.000     | 0.003    | 0.000    | 0.000    | 0.007   | 0.026   | 0.149   | 0.000   | 0.003   | 0.002   | 0.156   | 0.271   | 0.107   | 0.098    | 0.519    |

**Table S10.** Linear discriminant analysis (LDA) of nine populations. Percent variance, and the coefficients of linear discriminants of principal components.

|     | Percent variance<br>(%) | PC1      | PC2      | PC3      |
|-----|-------------------------|----------|----------|----------|
| LD1 | 0.6549                  | -1.12206 | 0.952843 | -0.30255 |
| LD2 | 0.3134                  | 0.557806 | 0.837894 | 0.529933 |
| LD3 | 0.0317                  | -0.39953 | -0.2045  | 0.861926 |
